# Supplementary material for: Incident Rheumatoid Arthritis Following Statin Use: From the View of a National Cohort Study in Korea
Source: MDPI journal article supplement (doi:10.3390/jpm12040559), 2022-04-01
Supplement: s1 [file s1]

**Table S1.** Crude and overlap propensity score weighted odd ratios of dates of any statin prescription for RA.

| Characteristics              | N of<br>RA          | N of<br>Control     | Odd ratios for RA (95% confidence interval) |         |                          |         |
|------------------------------|---------------------|---------------------|---------------------------------------------|---------|--------------------------|---------|
|                              | (exposure/total, %) | (exposure/total, %) | Crude                                       | P-value | Overlap weighted model † | P-value |
| Age < 60 years old (n=8,735) |                     |                     |                                             |         |                          |         |
| < 90 days                    | 1,632/1,747 (93.4%) | 6,552/6,988 (93.8%) | 1                                           |         | 1                        |         |
| 90 - 365 days                | 73/1,747 (4.2%)     | 226/6,988 (3.2%)    | 1.30 (0.99-1.70)                            | 0.059   | 1.17 (0.93–1.47)         | 0.176   |
| > 365 days                   | 42/1,747 (2.4%)     | 210/6,988 (3.0%)    | 0.80 (0.57-1.12)                            | 0.200   | 0.71 (0.54–0.92)         | 0.010*  |
| Age ≥ 60 years old (n=7,010) |                     |                     |                                             |         |                          |         |
| < 90 days                    | 1,186/1,402 (84.6%) | 4,695/5,608 (83.7%) | 1                                           |         | 1                        |         |
| 90 - 365 days                | 109/1,402 (7.8%)    | 386/5,608 (6.9%)    | 1.12 (0.90-1.40)                            | 0.325   | 1.10 (0.91–1.32)         | 0.341   |
| > 365 days                   | 107/1,402 (7.6%)    | 527/5,608 (9.4%)    | 0.80 (0.65-1.00)                            | 0.049*  | 0.77 (0.64–0.92)         | 0.004*  |
| Male (n=4,225)               |                     |                     |                                             |         |                          |         |
| < 90 days                    | 770/845 (91.1%)     | 3,028/3,380 (89.6%) | 1                                           |         | 1                        |         |
| 90 - 365 days                | 35/845 (4.1%)       | 134/3,380 (4.0%)    | 1.03 (0.70-1.50)                            | 0.890   | 0.90 (0.66–1.24)         | 0.517   |
| > 365 days                   | 40/845 (4.7%)       | 218/3,380 (6.4%)    | 0.72 (0.51-1.02)                            | 0.065   | 0.62 (0.47–0.82)         | 0.001*  |
| Female (n=11,520)            |                     |                     |                                             |         |                          |         |
| < 90 days                    | 2,048/2,304 (88.9%) | 8,219/9,216 (89.2%) | 1                                           |         | 1                        |         |
| 90 - 365 days                | 147/2,304 (6.4%)    | 478/9,216 (5.2%)    | 1.23 (1.02-1.49)                            | 0.031*  | 1.16 (0.99–1.37)         | 0.068   |
| > 365 days                   | 109/2,304 (4.7%)    | 519/9,216 (5.6%)    | 0.84 (0.68-1.04)                            | 0.114   | 0.76 (0.64–0.91)         | 0.002*  |
| Low income groups (n=7,730)  |                     |                     |                                             |         |                          |         |
| < 90 days                    | 1,398/1,546 (90.4%) | 5,588/6,184 (90.4%) | 1                                           |         | 1                        |         |
| 90 - 365 days                | 89/1,546 (5.8%)     | 284/6,184 (4.6%)    | 1.25 (0.98-1.60)                            | 0.072   | 1.12 (0.91–1.38)         | 0.271   |
| > 365 days                   | 59/1,546 (3.8%)     | 312/6,184 (5.0%)    | 0.76 (0.57-1.00)                            | 0.054   | 0.69 (0.55–0.87)         | 0.002*  |
| High income groups (n=8,015) |                     |                     |                                             |         |                          |         |
| < 90 days                    | 1,420/1,603 (88.6%) | 5,659/6,412 (88.3%) | 1                                           |         | 1                        |         |
| 90 - 365 days                | 93/1,603 (5.8%)     | 328/6,412 (5.1%)    | 1.13 (0.89-1.43)                            | 0.313   | 1.10 (0.90–1.34)         | 0.369   |
| > 365 days                   | 90/1,603 (5.6%)     | 425/6,412 (6.6%)    | 0.84 (0.67-1.07)                            | 0.157   | 0.75 (0.61–0.91)         | 0.003*  |
| Urban residents (n=6,800)    |                     |                     |                                             |         |                          |         |
| < 90 days                    | 1,210/1,360 (89.0%) | 4,793/5,440 (88.1%) | 1                                           |         | 1                        |         |
| 90 - 365 days                | 81/1,360 (6.0%)     | 298/5,440 (5.5%)    | 1.08 (0.84-1.39)                            | 0.568   | 1.05 (0.85–1.30)         | 0.650   |
| > 365 days                   | 69/1,360 (5.1%)     | 349/5,440 (6.4%)    | 0.78 (0.60-1.02)                            | 0.072   | 0.73 (0.58–0.90)         | 0.004*  |
| Rural residents (n=8,945)    |                     |                     |                                             |         |                          |         |
| < 90 days                    | 1,608/1,789 (89.9%) | 6,454/7,156 (90.2%) | 1                                           |         | 1                        |         |
| 90 - 365 days                | 101/1,789 (5.6%)    | 314/7,156 (4.4%)    | 1.29 (1.03-1.63)                            | 0.030*  | 1.16 (0.95–1.41)         | 0.136   |
| > 365 days                   | 80/1,789 (4.5%)     | 388/7,156 (5.4%)    | 0.83 (0.65-1.06)                            | 0.133   | 0.73 (0.60–0.90)         | 0.003*  |
| Underweight (n=344)          |                     |                     |                                             |         |                          |         |
| < 90 days                    | 60/61 (98.4%)       | 269/283 (95.1%)     | 1                                           |         | 1                        |         |
| 90 - 365 days                | 1/61 (1.6%)         | 6/283 (2.1%)        | N/A                                         |         | N/A                      |         |
| > 365 days                   | 0/61 (0.0%)         | 8/283 (2.8%)        | N/A                                         |         | N/A                      |         |
| Normal weight (n=5,768)      |                     |                     |                                             |         |                          |         |
| < 90 days                    | 1,120/1,201 (93.3%) | 4,214/4,567 (92.3%) | 1                                           |         | 1                        |         |
| 90 - 365 days                | 46/1,201 (3.8%)     | 161/4,567 (3.5%)    | 1.08 (0.77-1.50)                            | 0.672   | 0.93 (0.70–1.23)         | 0.616   |
| > 365 days                   | 35/1,201 (2.9%)     | 192/4,567 (4.2%)    | 0.69 (0.48-0.99)                            | 0.044*  | 0.57 (0.43–0.77)         | <0.001* |
| Overweight (n=4,186)         |                     |                     |                                             |         |                          |         |
| < 90 days                    | 742/826 (89.8%)     | 2,980/3,360 (88.7%) | 1                                           |         | 1                        |         |

|                                               |                     |                      |                  |        |                  |         |
|-----------------------------------------------|---------------------|----------------------|------------------|--------|------------------|---------|
| 90 - 365 days                                 | 44/826 (5.3%)       | 165/3,360 (4.9%)     | 1.07 (0.76-1.51) | 0.694  | 0.92 (0.69–1.22) | 0.569   |
| > 365 days                                    | 40/826 (4.8%)       | 215/3,360 (6.4%)     | 0.75 (0.53-1.06) | 0.100  | 0.65 (0.50–0.86) | 0.003*  |
| Obese (n=5,447)                               |                     |                      |                  |        |                  |         |
| < 90 days                                     | 896/1,061 (84.4%)   | 3,784/4,386 (86.3%)  | 1                |        | 1                |         |
| 90 - 365 days                                 | 91/1,061 (8.6%)     | 280/4,386 (6.4%)     | 1.37 (1.07-1.76) | 0.012* | 1.38 (1.12–1.71) | 0.003*  |
| > 365 days                                    | 74/1,061 (7.0%)     | 322/4,386 (7.3%)     | 0.97 (0.75-1.26) | 0.824  | 0.93 (0.75–1.16) | 0.513   |
| Non-smoker (n=13,079)                         |                     |                      |                  |        |                  |         |
| < 90 days                                     | 2,311/2,585 (89.4%) | 9,385/10,494 (89.4%) | 1                |        | 1                |         |
| 90 - 365 days                                 | 155/2,585 (6.0%)    | 520/10,494 (5.0%)    | 1.21 (1.01-1.46) | 0.043* | 1.15 (0.98–1.34) | 0.086   |
| > 365 days                                    | 119/2,585 (4.6%)    | 589/10,494 (5.6%)    | 0.82 (0.67-1.00) | 0.055  | 0.75 (0.64–0.88) | 0.001*  |
| Past and current smoker (n=2,666)             |                     |                      |                  |        |                  |         |
| < 90 days                                     | 507/564 (89.9%)     | 1,862/2,102 (88.6%)  | 1                |        | 1                |         |
| 90 - 365 days                                 | 27/564 (4.8%)       | 92/2,102 (4.4%)      | 1.08 (0.69-1.67) | 0.739  | 0.89 (0.61–1.30) | 0.559   |
| > 365 days                                    | 30/564 (5.3%)       | 148/2,102 (7.0%)     | 0.74 (0.50-1.12) | 0.153  | 0.63 (0.45–0.88) | 0.007*  |
| Alcohol consumption <1 time a week (n=12,420) |                     |                      |                  |        |                  |         |
| < 90 days                                     | 2,282/2,537 (89.9%) | 8,871/9,883 (89.8%)  | 1                |        | 1                |         |
| 90 - 365 days                                 | 142/2,537 (5.6%)    | 485/9,883 (4.9%)     | 1.14 (0.94-1.38) | 0.188  | 1.09 (0.93–1.28) | 0.302   |
| > 365 days                                    | 113/2,537 (4.5%)    | 527/9,883 (5.3%)     | 0.83 (0.68-1.03) | 0.087  | 0.78 (0.66–0.92) | 0.004*  |
| Alcohol consumption ≥1 time a week (n=3,325)  |                     |                      |                  |        |                  |         |
| < 90 days                                     | 536/612 (87.6%)     | 2,376/2,713 (87.6%)  | 1                |        | 1                |         |
| 90 - 365 days                                 | 40/612 (6.5%)       | 127/2,713 (4.7%)     | 1.40 (0.97-2.02) | 0.075  | 1.10 (0.80–1.51) | 0.545   |
| > 365 days                                    | 36/612 (5.9%)       | 210/2,713 (7.7%)     | 0.76 (0.53-1.10) | 0.142  | 0.56 (0.41–0.75) | <0.001* |
| SBP < 140 mmHg and DBP < 90 mmHg (n=11,670)   |                     |                      |                  |        |                  |         |
| < 90 days                                     | 2,152/2,403 (89.6%) | 8,293/9,267 (89.5%)  | 1                |        | 1                |         |
| 90 - 365 days                                 | 138/2,403 (5.7%)    | 449/9,267 (4.8%)     | 1.18 (0.97-1.44) | 0.092  | 1.07 (0.90–1.26) | 0.451   |
| > 365 days                                    | 113/2,403 (4.7%)    | 525/9,267 (5.7%)     | 0.83 (0.67-1.02) | 0.079  | 0.73 (0.61–0.87) | <0.001* |
| SBP ≥ 140 mmHg or DBP ≥ 90 mmHg (n=4,075)     |                     |                      |                  |        |                  |         |
| < 90 days                                     | 666/746 (89.3%)     | 2,954/3,329 (88.7%)  | 1                |        | 1                |         |
| 90 - 365 days                                 | 44/746 (5.9%)       | 163/3,329 (4.9%)     | 1.20 (0.85-1.69) | 0.304  | 1.18 (0.89–1.56) | 0.249   |
| > 365 days                                    | 36/746 (4.8%)       | 212/3,329 (6.4%)     | 0.75 (0.52-1.08) | 0.126  | 0.72 (0.54–0.95) | 0.021*  |
| Fasting blood glucose < 100 mg/dL (n=10,584)  |                     |                      |                  |        |                  |         |
| < 90 days                                     | 2,028/2,200 (92.2%) | 7,692/8,384 (91.7%)  | 1                |        | 1                |         |
| 90 - 365 days                                 | 91/2,200 (4.1%)     | 337/8,384 (4.0%)     | 1.02 (0.81-1.30) | 0.843  | 0.92 (0.75–1.12) | 0.390   |
| > 365 days                                    | 81/2,200 (3.7%)     | 355/8,384 (4.2%)     | 0.87 (0.68-1.11) | 0.250  | 0.75 (0.61–0.92) | 0.005*  |
| Fasting blood glucose ≥ 100 mg/dL (n=5,161)   |                     |                      |                  |        |                  |         |
| < 90 days                                     | 790/949 (83.2%)     | 3,555/4,212 (84.4%)  | 1                |        | 1                |         |
| 90 - 365 days                                 | 91/949 (9.6%)       | 275/4,212 (6.5%)     | 1.49 (1.16-1.91) | 0.002* | 1.39 (1.12–1.72) | 0.002*  |
| > 365 days                                    | 68/949 (7.2%)       | 382/4,212 (9.1%)     | 0.80 (0.61-1.05) | 0.107  | 0.74 (0.60–0.92) | 0.006*  |
| Total cholesterol < 200 mg/dL (n=7,977)       |                     |                      |                  |        |                  |         |
| < 90 days                                     | 1,489/1,640 (90.8%) | 5,689/6,337 (89.8%)  | 1                |        | 1                |         |
| 90 - 365 days                                 | 60/1,640 (3.7%)     | 190/6,337 (3.0%)     | 1.21 (0.90-1.62) | 0.213  | 1.01 (0.78–1.29) | 0.966   |
| > 365 days                                    | 91/1,640 (5.5%)     | 458/6,337 (7.2%)     | 0.76 (0.60-0.96) | 0.020* | 0.66 (0.54–0.80) | <0.001* |
| Total cholesterol ≥ 200 mg/dL (n=7,768)       |                     |                      |                  |        |                  |         |
| < 90 days                                     | 1,329/1,509 (88.1%) | 5,558/6,259 (88.8%)  | 1                |        | 1                |         |
| 90 - 365 days                                 | 122/1,509 (8.1%)    | 422/6,259 (6.7%)     | 1.21 (0.98-1.49) | 0.077  | 1.16 (0.97–1.38) | 0.099   |
| > 365 days                                    | 58/1,509 (3.8%)     | 279/6,259 (4.5%)     | 0.87 (0.65-1.16) | 0.343  | 0.84 (0.67–1.06) | 0.137   |

|                                                                     |                     |                       |                  |         |                  |         |
|---------------------------------------------------------------------|---------------------|-----------------------|------------------|---------|------------------|---------|
| Hemoglobin $\geq 12$ g/dL for men and $> 10$ g/dL for women (n=301) |                     |                       |                  |         |                  |         |
| < 90 days                                                           | 70/75 (93.3%)       | 208/226 (92.0%)       | 1                |         | 1                |         |
| 90 - 365 days                                                       | 3/75 (4.0%)         | 6/226 (2.7%)          | 1.49 (0.36-6.10) | 0.583   | 1.13 (0.28–4.51) | 0.865   |
| > 365 days                                                          | 2/75 (2.7%)         | 12/226 (5.3%)         | 0.50 (0.11-2.27) | 0.365   | 0.45 (0.12–1.69) | 0.237   |
| Hemoglobin $< 12$ g/dL for men and $< 10$ g/dL for women (n=15,444) |                     |                       |                  |         |                  |         |
| < 90 days                                                           | 2,748/3,074 (89.4%) | 11,039/12,370 (89.2%) | 1                |         | 1                |         |
| 90 - 365 days                                                       | 179/3,074 (5.8%)    | 606/12,370 (4.9%)     | 1.19 (1.00-1.41) | 0.051   | 1.10 (0.95–1.27) | 0.197   |
| > 365 days                                                          | 147/3,074 (4.8%)    | 725/12,370 (5.9%)     | 0.81 (0.68-0.98) | 0.027*  | 0.74 (0.63–0.85) | <0.001* |
| CCI scores = 0 (n=11,002)                                           |                     |                       |                  |         |                  |         |
| < 90 days                                                           | 1,869/2,058 (90.8%) | 8,100/8,944 (90.6%)   | 1                |         | 1                |         |
| 90 - 365 days                                                       | 105/2,058 (5.1%)    | 398/8,944 (4.4%)      | 1.14 (0.92-1.43) | 0.234   | 1.07 (0.90–1.29) | 0.436   |
| > 365 days                                                          | 84/2,058 (4.1%)     | 446/8,944 (5.0%)      | 0.82 (0.64-1.04) | 0.095   | 0.76 (0.63–0.92) | 0.004*  |
| CCI scores = 1 (n=2,213)                                            |                     |                       |                  |         |                  |         |
| < 90 days                                                           | 501/573 (87.4%)     | 1,423/1,640 (86.8%)   | 1                |         | 1                |         |
| 90 - 365 days                                                       | 39/573 (6.8%)       | 95/1,640 (5.8%)       | 1.17 (0.79-1.72) | 0.436   | 1.22 (0.85–1.76) | 0.273   |
| > 365 days                                                          | 33/573 (5.8%)       | 122/1,640 (7.4%)      | 0.77 (0.52-1.14) | 0.194   | 0.79 (0.55–1.13) | 0.205   |
| CCI scores $\geq 2$ (n=2,530)                                       |                     |                       |                  |         |                  |         |
| < 90 days                                                           | 448/518 (86.5%)     | 1,724/2,012 (85.7%)   | 1                |         | 1                |         |
| 90 - 365 days                                                       | 38/518 (7.3%)       | 119/2,012 (5.9%)      | 1.23 (0.84-1.80) | 0.287   | 1.09 (0.78–1.52) | 0.601   |
| > 365 days                                                          | 32/518 (6.2%)       | 169/2,012 (8.4%)      | 0.73 (0.49-1.08) | 0.114   | 0.62 (0.45–0.86) | 0.004*  |
| Non dyslipidemia history (n=8,594)                                  |                     |                       |                  |         |                  |         |
| < 90 days                                                           | 1,564/1,596 (98.0%) | 6,885/6,998 (98.4%)   | 1                |         | 1                |         |
| 90 - 365 days                                                       | 16/1,596 (1.0%)     | 54/6,998 (0.8%)       | 1.30 (0.74-2.29) | 0.353   | 1.34 (0.84–2.15) | 0.218   |
| > 365 days                                                          | 16/1,596 (1.0%)     | 59/6,998 (0.8%)       | 1.19 (0.69-2.08) | 0.532   | 1.18 (0.75–1.86) | 0.474   |
| Dyslipidemia history (n=7,151)                                      |                     |                       |                  |         |                  |         |
| < 90 days                                                           | 1,254/1,553 (80.7%) | 4,362/5,598 (77.9%)   | 1                |         | 1                |         |
| 90 - 365 days                                                       | 166/1,553 (10.7%)   | 558/5,598 (10.0%)     | 1.03 (0.86-1.24) | 0.716   | 1.12 (0.95–1.31) | 0.169   |
| > 365 days                                                          | 133/1,553 (8.6%)    | 678/5,598 (12.1%)     | 0.68 (0.56-0.83) | <0.001* | 0.72 (0.61–0.84) | <0.001* |

Abbreviations: RA, Rheumatoid arthritis; CCI, Charlson Comorbidity Index; SBP, Systolic blood pressure; DBP, Diastolic blood pressure;

\* Significance at  $P < 0.05$

† Adjusted for age, sex, income, region of residence, SBP, DBP, fasting blood glucose, total cholesterol, hemoglobin, obesity, smoking, alcohol consumption, dyslipidemia history, and CCI scores.

**Table S2.** Crude and overlap propensity score weighted odd ratios of dates of lipophilic statin prescription for RA

| Characteristics              | N of<br>RA          | N of<br>Control     | Odd ratios for RA (95% confidence interval) |         |                          |         |
|------------------------------|---------------------|---------------------|---------------------------------------------|---------|--------------------------|---------|
|                              | (exposure/total, %) | (exposure/total, %) | Crude                                       | P-value | Overlap weighted model † | P-value |
| Age < 60 years old (n=8,735) |                     |                     |                                             |         |                          |         |
| < 90 days                    | 1,650/1,747 (94.4%) | 6,597/6,988 (94.4%) | 1                                           |         | 1                        |         |
| 90 - 365 days                | 67/1,747 (3.8%)     | 209/6,988 (3.0%)    | 1.28 (0.97-1.70)                            | 0.083   | 1.16 (0.91–1.47)         | 0.229   |
| > 365 days                   | 30/1,747 (1.7%)     | 182/6,988 (2.6%)    | 0.66 (0.45-0.97)                            | 0.037*  | 0.58 (0.43–0.78)         | <0.001* |
| Age ≥ 60 years old (n=7,010) |                     |                     |                                             |         |                          |         |
| < 90 days                    | 1,214/1,402 (86.6%) | 4,794/5,608 (85.5%) | 1                                           |         | 1                        |         |
| 90 - 365 days                | 95/1,402 (6.8%)     | 377/5,608 (6.7%)    | 1.00 (0.79-1.26)                            | 0.967   | 0.97 (0.80–1.18)         | 0.775   |
| > 365 days                   | 93/1,402 (6.6%)     | 437/5,608 (7.8%)    | 0.84 (0.67-1.06)                            | 0.143   | 0.80 (0.66–0.97)         | 0.026*  |
| Male (n= 4,225)              |                     |                     |                                             |         |                          |         |
| < 90 days                    | 784/845 (92.8%)     | 3,075/3,380 (91.0%) | 1                                           |         | 1                        |         |
| 90 - 365 days                | 29/845 (3.4%)       | 131/3,380 (3.9%)    | 0.87 (0.58-1.31)                            | 0.499   | 0.77 (0.55–1.07)         | 0.119   |
| > 365 days                   | 32/845 (3.8%)       | 174/3,380 (5.1%)    | 0.72 (0.49-1.06)                            | 0.097   | 0.62 (0.46–0.85)         | 0.003*  |
| Female (n=11,520)            |                     |                     |                                             |         |                          |         |
| < 90 days                    | 2,080/2,304 (90.3%) | 8,316/9,216 (90.2%) | 1                                           |         | 1                        |         |
| 90 - 365 days                | 133/2,304 (5.8%)    | 455/9,216 (4.9%)    | 1.17 (0.96-1.43)                            | 0.125   | 1.10 (0.93–1.30)         | 0.283   |
| > 365 days                   | 91/2,304 (3.9%)     | 445/9,216 (4.8%)    | 0.82 (0.65-1.03)                            | 0.087   | 0.74 (0.61–0.89)         | 0.001*  |
| Low income groups (n=7,730)  |                     |                     |                                             |         |                          |         |
| < 90 days                    | 1,414/1,546 (91.5%) | 5,642/6,184 (91.2%) | 1                                           |         | 1                        |         |
| 90 - 365 days                | 83/1,546 (5.4%)     | 272/6,184 (4.4%)    | 1.22 (0.95-1.57)                            | 0.127   | 1.10 (0.89–1.36)         | 0.386   |
| > 365 days                   | 49/1,546 (3.2%)     | 270/6,184 (4.4%)    | 0.72 (0.53-0.99)                            | 0.041*  | 0.67 (0.52–0.86)         | 0.001*  |
| High income groups (n=8,015) |                     |                     |                                             |         |                          |         |
| < 90 days                    | 1,450/1,603 (90.5%) | 5,749/6,412 (89.7%) | 1                                           |         | 1                        |         |
| 90 - 365 days                | 79/1,603 (4.9%)     | 314/6,412 (4.9%)    | 1.00 (0.77-1.29)                            | 0.985   | 0.96 (0.78–1.18)         | 0.686   |
| > 365 days                   | 74/1,603 (4.6%)     | 349/6,412 (5.4%)    | 0.84 (0.65-1.09)                            | 0.186   | 0.74 (0.60–0.91)         | 0.005*  |
| Urban residents (n=6,800)    |                     |                     |                                             |         |                          |         |
| < 90 days                    | 1,229/1,360 (90.4%) | 4,879/5,440 (89.7%) | 1                                           |         | 1                        |         |
| 90 - 365 days                | 74/1,360 (5.4%)     | 274/5,440 (5.0%)    | 1.07 (0.82-1.40)                            | 0.605   | 1.05 (0.84–1.31)         | 0.677   |
| > 365 days                   | 57/1,360 (4.2%)     | 287/5,440 (5.3%)    | 0.79 (0.59-1.05)                            | 0.110   | 0.74 (0.58–0.94)         | 0.012*  |
| Rural residents (n=8,945)    |                     |                     |                                             |         |                          |         |
| < 90 days                    | 1,635/1,789 (91.4%) | 6,512/7,156 (91.0%) | 1                                           |         | 1                        |         |
| 90 - 365 days                | 88/1,789 (4.9%)     | 312/7,156 (4.4%)    | 1.12 (0.88-1.43)                            | 0.348   | 1.00 (0.82–1.23)         | 0.983   |
| > 365 days                   | 66/1,789 (3.7%)     | 332/7,156 (4.6%)    | 0.79 (0.60-1.04)                            | 0.090   | 0.70 (0.56–0.86)         | 0.001*  |
| Underweight (n=344)          |                     |                     |                                             |         |                          |         |
| < 90 days                    | 60/61 (98.4%)       | 273/283 (96.5%)     | 1                                           |         | 1                        |         |
| 90 - 365 days                | 1/61 (1.6%)         | 4/283 (1.4%)        | N/A                                         |         | N/A                      |         |
| > 365 days                   | 0/61 (0.0%)         | 6/283 (2.1%)        | N/A                                         |         | N/A                      |         |
| Normal weight (n=5,768)      |                     |                     |                                             |         |                          |         |
| < 90 days                    | 1,133/1,201 (94.3%) | 4,241/4,567 (92.9%) | 1                                           |         | 1                        |         |
| 90 - 365 days                | 41/1,201 (3.4%)     | 163/4,567 (3.6%)    | 0.94 (0.66-1.33)                            | 0.735   | 0.81 (0.61–1.08)         | 0.152   |
| > 365 days                   | 27/1,201 (2.2%)     | 163/4,567 (3.6%)    | 0.62 (0.41-0.94)                            | 0.023*  | 0.51 (0.37–0.71)         | <0.001* |
| Overweight (n=4,186)         |                     |                     |                                             |         |                          |         |
| < 90 days                    | 756/826 (91.5%)     | 3,031/3,360 (90.2%) | 1                                           |         | 1                        |         |

|                                               |                     |                      |                  |        |                  |         |
|-----------------------------------------------|---------------------|----------------------|------------------|--------|------------------|---------|
| 90 - 365 days                                 | 36/826 (4.4%)       | 149/3,360 (4.4%)     | 0.97 (0.67-1.41) | 0.867  | 0.84 (0.62–1.14) | 0.270   |
| > 365 days                                    | 34/826 (4.1%)       | 180/3,360 (5.4%)     | 0.76 (0.52-1.10) | 0.147  | 0.67 (0.50–0.90) | 0.009*  |
| Obese (n=5,447)                               |                     |                      |                  |        |                  |         |
| < 90 days                                     | 915/1,061 (86.2%)   | 3,846/4,386 (87.7%)  | 1                |        | 1                |         |
| 90 - 365 days                                 | 84/1,061 (7.9%)     | 270/4,386 (6.2%)     | 1.31 (1.01-1.69) | 0.039* | 1.31 (1.06–1.63) | 0.014*  |
| > 365 days                                    | 62/1,061 (5.8%)     | 270/4,386 (6.2%)     | 0.97 (0.73-1.28) | 0.808  | 0.92 (0.73–1.17) | 0.502   |
| Non-smoker (n=13,079)                         |                     |                      |                  |        |                  |         |
| < 90 days                                     | 2,345/2,585 (90.7%) | 9,504/10,494 (90.6%) | 1                |        | 1                |         |
| 90 - 365 days                                 | 140/2,585 (5.4%)    | 494/10,494 (4.7%)    | 1.15 (0.95-1.39) | 0.160  | 1.09 (0.92–1.28) | 0.314   |
| > 365 days                                    | 100/2,585 (3.9%)    | 496/10,494 (4.7%)    | 0.82 (0.66-1.02) | 0.071  | 0.75 (0.63–0.89) | 0.001*  |
| Past and current smoker (n=2,666)             |                     |                      |                  |        |                  |         |
| < 90 days                                     | 519/564 (92.0%)     | 1,887/2,102 (89.8%)  | 1                |        | 1                |         |
| 90 - 365 days                                 | 22/564 (3.9%)       | 92/2,102 (4.4%)      | 0.87 (0.54-1.40) | 0.564  | 0.72 (0.48–1.06) | 0.098   |
| > 365 days                                    | 23/564 (4.1%)       | 123/2,102 (5.9%)     | 0.68 (0.43-1.07) | 0.097  | 0.57 (0.39–0.83) | 0.004*  |
| Alcohol consumption <1 time a week (n=12,420) |                     |                      |                  |        |                  |         |
| < 90 days                                     | 2,315/2,537 (91.2%) | 8,982/9,883 (90.9%)  | 1                |        | 1                |         |
| 90 - 365 days                                 | 126/2,537 (5.0%)    | 456/9,883 (4.6%)     | 1.07 (0.88-1.31) | 0.501  | 1.03 (0.87–1.22) | 0.755   |
| > 365 days                                    | 96/2,537 (3.8%)     | 445/9,883 (4.5%)     | 0.84 (0.67-1.05) | 0.122  | 0.78 (0.65–0.94) | 0.009*  |
| Alcohol consumption ≥1 time a week (n=3,325)  |                     |                      |                  |        |                  |         |
| < 90 days                                     | 549/612 (89.7%)     | 2,409/2,713 (88.8%)  | 1                |        | 1                |         |
| 90 - 365 days                                 | 36/612 (5.9%)       | 130/2,713 (4.8%)     | 1.22 (0.83-1.78) | 0.316  | 0.93 (0.68–1.29) | 0.675   |
| > 365 days                                    | 27/612 (4.4%)       | 174/2,713 (6.4%)     | 0.68 (0.45-1.03) | 0.071  | 0.49 (0.35–0.68) | <0.001* |
| SBP < 140 mmHg and DBP < 90 mmHg (n=11,670)   |                     |                      |                  |        |                  |         |
| < 90 days                                     | 2,186/2,403 (91.0%) | 8,397/9,267 (90.6%)  | 1                |        | 1                |         |
| 90 - 365 days                                 | 124/2,403 (5.2%)    | 431/9,267 (4.7%)     | 1.11 (0.90-1.36) | 0.340  | 1.00 (0.84–1.19) | 0.965   |
| > 365 days                                    | 93/2,403 (3.9%)     | 439/9,267 (4.7%)     | 0.81 (0.65-1.02) | 0.077  | 0.72 (0.59–0.86) | 0.001*  |
| SBP ≥ 140 mmHg or DBP ≥ 90 mmHg (n=4,075)     |                     |                      |                  |        |                  |         |
| < 90 days                                     | 678/746 (90.9%)     | 2,994/3,329 (89.9%)  | 1                |        | 1                |         |
| 90 - 365 days                                 | 38/746 (5.1%)       | 155/3,329 (4.7%)     | 1.08 (0.75-1.56) | 0.670  | 1.07 (0.80–1.43) | 0.660   |
| > 365 days                                    | 30/746 (4.0%)       | 180/3,329 (5.4%)     | 0.74 (0.50-1.09) | 0.129  | 0.69 (0.51–0.93) | 0.017*  |
| Fasting blood glucose < 100 mg/dL (n=10,584)  |                     |                      |                  |        |                  |         |
| < 90 days                                     | 2,054/2,200 (93.4%) | 7,763/8,384 (92.6%)  | 1                |        | 1                |         |
| 90 - 365 days                                 | 80/2,200 (3.6%)     | 316/8,384 (3.8%)     | 0.96 (0.75-1.23) | 0.729  | 0.85 (0.69–1.05) | 0.125   |
| > 365 days                                    | 66/2,200 (3.0%)     | 305/8,384 (3.6%)     | 0.82 (0.62-1.07) | 0.145  | 0.71 (0.57–0.88) | 0.002*  |
| Fasting blood glucose ≥ 100 mg/dL (n=5,161)   |                     |                      |                  |        |                  |         |
| < 90 days                                     | 810/949 (85.4%)     | 3,628/4,212 (86.1%)  | 1                |        | 1                |         |
| 90 - 365 days                                 | 82/949 (8.6%)       | 270/4,212 (6.4%)     | 1.36 (1.05-1.76) | 0.020* | 1.27 (1.02–1.57) | 0.033*  |
| > 365 days                                    | 57/949 (6.0%)       | 314/4,212 (7.5%)     | 0.81 (0.61-1.09) | 0.165  | 0.75 (0.60–0.95) | 0.018*  |
| Total cholesterol < 200 mg/dL (n=7,977)       |                     |                      |                  |        |                  |         |
| < 90 days                                     | 1,505/1,640 (91.8%) | 5,758/6,337 (90.9%)  | 1                |        | 1                |         |
| 90 - 365 days                                 | 56/1,640 (3.4%)     | 189/6,337 (3.0%)     | 1.13 (0.84-1.54) | 0.418  | 0.95 (0.74–1.23) | 0.699   |
| > 365 days                                    | 79/1,640 (4.8%)     | 390/6,337 (6.2%)     | 0.78 (0.60-0.99) | 0.044* | 0.68 (0.55–0.84) | <0.001* |
| Total cholesterol ≥ 200 mg/dL (n=7,768)       |                     |                      |                  |        |                  |         |
| < 90 days                                     | 1,359/1,509 (90.1%) | 5,633/6,259 (90.0%)  | 1                |        | 1                |         |
| 90 - 365 days                                 | 106/1,509 (7.0%)    | 397/6,259 (6.3%)     | 1.11 (0.89-1.38) | 0.371  | 1.06 (0.88–1.27) | 0.563   |
| > 365 days                                    | 44/1,509 (2.9%)     | 229/6,259 (3.7%)     | 0.80 (0.57-1.11) | 0.174  | 0.76 (0.59–0.98) | 0.034*  |

|                                                                     |                     |                       |                  |         |                  |         |
|---------------------------------------------------------------------|---------------------|-----------------------|------------------|---------|------------------|---------|
| Hemoglobin $\geq$ 12 g/dL for men and $>$ 10 g/dL for women (n=301) |                     |                       |                  |         |                  |         |
| < 90 days                                                           | 71/75 (94.7%)       | 210/226 (92.9%)       | 1                |         | 1                |         |
| 90 - 365 days                                                       | 3/75 (4.0%)         | 8/226 (3.5%)          | 1.11 (0.29-4.30) | 0.881   | 0.88 (0.42–3.21) | 0.844   |
| > 365 days                                                          | 1/75 (1.3%)         | 8/226 (3.5%)          | 0.37 (0.05-3.01) | 0.352   | 0.27 (0.04–1.61) | 0.149   |
| Hemoglobin $<$ 12 g/dL for men and $<$ 10 g/dL for women (n=15,444) |                     |                       |                  |         |                  |         |
| < 90 days                                                           | 2,793/3,074 (90.9%) | 11,181/12,370 (90.4%) | 1                |         | 1                |         |
| 90 - 365 days                                                       | 159/3,074 (5.2%)    | 578/12,370 (4.7%)     | 1.10 (0.92-1.32) | 0.295   | 1.02 (0.88–1.19) | 0.785   |
| > 365 days                                                          | 122/3,074 (4.0%)    | 611/12,370 (4.9%)     | 0.80 (0.66-0.98) | 0.027*  | 0.72 (0.61–0.84) | <0.001* |
| CCI scores = 0 (n=11,002)                                           |                     |                       |                  |         |                  |         |
| < 90 days                                                           | 1,893/2,058 (92.0%) | 8,185/8,944 (91.5%)   | 1                |         | 1                |         |
| 90 - 365 days                                                       | 98/2,058 (4.8%)     | 376/8,944 (4.2%)      | 1.13 (0.90-1.42) | 0.304   | 1.05 (0.88–1.27) | 0.579   |
| > 365 days                                                          | 67/2,058 (3.3%)     | 383/8,944 (4.3%)      | 0.76 (0.58-0.99) | 0.039*  | 0.70 (0.57–0.86) | 0.001*  |
| CCI scores = 1 (n=2,213)                                            |                     |                       |                  |         |                  |         |
| < 90 days                                                           | 512/573 (89.4%)     | 1,442/1,640 (87.9%)   | 1                |         | 1                |         |
| 90 - 365 days                                                       | 33/573 (5.8%)       | 93/1,640 (5.7%)       | 1.00 (0.66-1.51) | 0.998   | 1.04 (0.71–1.51) | 0.850   |
| > 365 days                                                          | 28/573 (4.9%)       | 105/1,640 (6.4%)      | 0.75 (0.49-1.15) | 0.191   | 0.78 (0.53–1.14) | 0.194   |
| CCI scores $\geq$ 2 (n=2,530)                                       |                     |                       |                  |         |                  |         |
| < 90 days                                                           | 459/518 (88.6%)     | 1,764/2,012 (87.7%)   | 1                |         | 1                |         |
| 90 - 365 days                                                       | 31/518 (6.0%)       | 117/2,012 (5.8%)      | 1.02 (0.68-1.53) | 0.931   | 0.92 (0.65–1.31) | 0.657   |
| > 365 days                                                          | 28/518 (5.4%)       | 131/2,012 (6.5%)      | 0.82 (0.54-1.25) | 0.360   | 0.70 (0.49–1.00) | 0.048*  |
| Non dyslipidemia history (n=8,594)                                  |                     |                       |                  |         |                  |         |
| < 90 days                                                           | 1,571/1,596 (98.4%) | 6,898/6,998 (98.6%)   | 1                |         | 1                |         |
| 90 - 365 days                                                       | 13/1,596 (0.8%)     | 51/6,998 (0.7%)       | 1.12 (0.61-2.06) | 0.718   | 1.17 (0.71–1.92) | 0.548   |
| > 365 days                                                          | 12/1,596 (0.8%)     | 49/6,998 (0.7%)       | 1.08 (0.57-2.03) | 0.822   | 1.07 (0.64–1.79) | 0.800   |
| Dyslipidemia history (n=7,151)                                      |                     |                       |                  |         |                  |         |
| < 90 days                                                           | 1,293/1,553 (83.3%) | 4,493/5,598 (80.3%)   | 1                |         | 1                |         |
| 90 - 365 days                                                       | 149/1,553 (9.6%)    | 535/5,598 (9.6%)      | 0.97 (0.80-1.17) | 0.738   | 1.04 (0.88–1.22) | 0.636   |
| > 365 days                                                          | 111/1,553 (7.1%)    | 570/5,598 (10.2%)     | 0.68 (0.55-0.84) | <0.001* | 0.71 (0.60–0.85) | <0.001* |

Abbreviations: RA, Rheumatoid arthritis; CCI, Charlson Comorbidity Index; SBP, Systolic blood pressure; DBP, Diastolic blood pressure;

\* Significance at  $P < 0.05$

† Adjusted for age, sex, income, region of residence, SBP, DBP, fasting blood glucose, total cholesterol, hemoglobin, obesity, smoking, alcohol consumption, dyslipidemia history, and CCI scores.

**Table S3.** Crude and overlap propensity score weighted odd ratios of dates of hydrophilic statin prescription for RA

| Characteristics              | N of<br>RA          | N of<br>Control     | Odd ratios for RA (95% confidence interval) |         |                          |         |
|------------------------------|---------------------|---------------------|---------------------------------------------|---------|--------------------------|---------|
|                              | (exposure/total, %) | (exposure/total, %) | Crude                                       | P-value | Overlap weighted model † | P-value |
| Age < 60 years old (n=8,735) |                     |                     |                                             |         |                          |         |
| < 90 days                    | 1,727/1,747 (98.9%) | 6,930/6,988 (99.2%) | 1                                           |         | 1                        |         |
| 90 - 365 days                | 0/1,747 (0.5%)      | 37/6,988 (0.5%)     | 0.98 (0.47-2.03)                            | 0.948   | 0.87 (0.48–1.55)         | 0.629   |
| > 365 days                   | 11/1,747 (0.6%)     | 21/6,988 (0.3%)     | 2.10 (1.01-4.37)                            | 0.047*  | 1.85 (0.97–3.52)         | 0.061   |
| Age ≥ 60 years old (n=7,010) |                     |                     |                                             |         |                          |         |
| < 90 days                    | 1,365/1,402 (97.4%) | 5,449/5,608 (97.2%) | 1                                           |         | 1                        |         |
| 90 - 365 days                | 24/1,402 (1.7%)     | 96/5,608 (1.7%)     | 1.00 (0.64-1.57)                            | 0.993   | 0.99 (0.69–1.43)         | 0.961   |
| > 365 days                   | 13/1,402 (0.9%)     | 63/5,608 (1.1%)     | 0.82 (0.45-1.50)                            | 0.527   | 0.80 (0.50–1.28)         | 0.355   |
| Male (n=4,225)               |                     |                     |                                             |         |                          |         |
| < 90 days                    | 830/845 (98.2%)     | 3,312/3,380 (98.0%) | 1                                           |         | 1                        |         |
| 90 - 365 days                | 8/845 (0.9%)        | 29/3,380 (0.9%)     | 1.10 (0.50-2.42)                            | 0.811   | 0.98 (0.52–1.87)         | 0.957   |
| > 365 days                   | 7/845 (0.8%)        | 39/3,380 (1.2%)     | 0.72 (0.32-1.61)                            | 0.419   | 0.65 (0.36–1.19)         | 0.162   |
| Female (n=11,520)            |                     |                     |                                             |         |                          |         |
| < 90 days                    | 2,262/2,304 (98.2%) | 9,067/9,216 (98.4%) | 1                                           |         | 1                        |         |
| 90 - 365 days                | 25/2,304 (1.1%)     | 104/9,216 (1.1%)    | 0.96 (0.62-1.49)                            | 0.868   | 0.92 (0.65–1.31)         | 0.636   |
| > 365 days                   | 17/2,304 (0.7%)     | 45/9,216 (0.5%)     | 1.52 (0.87-2.65)                            | 0.146   | 1.41 (0.88–2.28)         | 0.157   |
| Low income groups (n=7,730)  |                     |                     |                                             |         |                          |         |
| < 90 days                    | 1,521/1,546 (98.4%) | 6,103/6,184 (98.7%) | 1                                           |         | 1                        |         |
| 90 - 365 days                | 16/1,546 (1.0%)     | 53/6,184 (0.9%)     | 1.21 (0.69-2.12)                            | 0.504   | 1.11 (0.70–1.76)         | 0.665   |
| > 365 days                   | 9/1,546 (0.6%)      | 28/6,184 (0.5%)     | 1.29 (0.61-2.74)                            | 0.508   | 1.14 (0.62–2.11)         | 0.664   |
| High income groups (n=8,015) |                     |                     |                                             |         |                          |         |
| < 90 days                    | 1,571/1,603 (98.0%) | 6,276/6,412 (97.9%) | 1                                           |         | 1                        |         |
| 90 - 365 days                | 17/1,603 (1.1%)     | 80/6,412 (1.2%)     | 0.85 (0.50-1.44)                            | 0.542   | 0.81 (0.53–1.23)         | 0.323   |
| > 365 days                   | 15/1,603 (0.9%)     | 56/6,412 (0.9%)     | 1.07 (0.60-1.90)                            | 0.817   | 0.98 (0.62–1.56)         | 0.946   |
| Urban residents (n=6,800)    |                     |                     |                                             |         |                          |         |
| < 90 days                    | 1,333/1,360 (98.0%) | 5,323/5,440 (97.8%) | 1                                           |         | 1                        |         |
| 90 - 365 days                | 17/1,360 (1.3%)     | 68/5,440 (1.3%)     | 1.00 (0.58-1.70)                            | 0.995   | 0.99 (0.64–1.53)         | 0.950   |
| > 365 days                   | 10/1,360 (0.7%)     | 49/5,440 (0.9%)     | 0.81 (0.41-1.61)                            | 0.557   | 0.76 (0.45–1.28)         | 0.302   |
| Rural residents (n=8,945)    |                     |                     |                                             |         |                          |         |
| < 90 days                    | 1,759/1,789 (98.3%) | 7,056/7,156 (98.6%) | 1                                           |         | 1                        |         |
| 90 - 365 days                | 16/1,789 (0.9%)     | 65/7,156 (0.9%)     | 0.99 (0.57-1.71)                            | 0.964   | 0.92 (0.60–1.43)         | 0.715   |
| > 365 days                   | 14/1,789 (0.8%)     | 35/7,156 (0.5%)     | 1.61 (0.86-2.99)                            | 0.135   | 1.45 (0.86–2.46)         | 0.164   |
| Underweight (n=344)          |                     |                     |                                             |         |                          |         |
| < 90 days                    | 61/61 (100.0%)      | 279/283 (98.6%)     | 1                                           |         | 1                        |         |
| 90 - 365 days                | 0/61 (0.0%)         | 2/283 (0.7%)        | N/A                                         |         | N/A                      |         |
| > 365 days                   | 0/61 (0.0%)         | 2/283 (0.7%)        | N/A                                         |         | N/A                      |         |
| Normal weight (n=5,768)      |                     |                     |                                             |         |                          |         |
| < 90 days                    | 1,183/1,201 (98.5%) | 4,520/4,567 (99.0%) | 1                                           |         | 1                        |         |
| 90 - 365 days                | 12/1,201 (1.0%)     | 28/4,567 (0.6%)     | 1.64 (0.83-3.23)                            | 0.154   | 1.45 (0.80–2.62)         | 0.224   |
| > 365 days                   | 6/1,201 (0.5%)      | 19/4,567 (0.4%)     | 1.21 (0.48-3.03)                            | 0.689   | 1.11 (0.52–2.38)         | 0.789   |
| Overweight (n=4,186)         |                     |                     |                                             |         |                          |         |
| < 90 days                    | 811/826 (98.2%)     | 3,295/3,360 (98.1%) | 1                                           |         | 1                        |         |

|                                               |                     |                       |                  |       |                  |        |
|-----------------------------------------------|---------------------|-----------------------|------------------|-------|------------------|--------|
| 90 - 365 days                                 | 9/826 (1.1%)        | 39/3,360 (1.2%)       | 0.94 (0.45-1.95) | 0.865 | 0.86 (0.48–1.54) | 0.613  |
| > 365 days                                    | 6/826 (0.7%)        | 26/3,360 (0.8%)       | 0.94 (0.39-2.29) | 0.889 | 0.82 (0.41–1.64) | 0.574  |
| Obese (n=5,447)                               |                     |                       |                  |       |                  |        |
| < 90 days                                     | 1,037/1,061 (97.7%) | 4,285/4,386 (97.7%)   | 1                |       | 1                |        |
| 90 - 365 days                                 | 12/1,061 (1.1%)     | 64/4,386 (1.5%)       | 0.77 (0.42-1.44) | 0.420 | 0.77 (0.48–1.24) | 0.278  |
| > 365 days                                    | 12/1,061 (1.1%)     | 37/4,386 (0.8%)       | 1.34 (0.70-2.58) | 0.380 | 1.29 (0.75–2.20) | 0.357  |
| Non-smoker (n=13,079)                         |                     |                       |                  |       |                  |        |
| < 90 days                                     | 2,542/2,585 (98.3%) | 10,317/10,494 (98.3%) | 1                |       | 1                |        |
| 90 - 365 days                                 | 25/2,585 (1.0%)     | 114/10,494 (1.1%)     | 0.89 (0.58-1.38) | 0.600 | 0.85 (0.60–1.19) | 0.343  |
| > 365 days                                    | 18/2,585 (0.7%)     | 63/10,494 (0.6%)      | 1.16 (0.69-1.96) | 0.581 | 1.08 (0.71–1.66) | 0.719  |
| Past and current smoker (n=2,666)             |                     |                       |                  |       |                  |        |
| < 90 days                                     | 550/564 (97.5%)     | 2,062/2,102 (98.1%)   | 1                |       | 1                |        |
| 90 - 365 days                                 | 8/564 (1.4%)        | 19/2,102 (0.9%)       | 1.58 (0.69-3.63) | 0.281 | 1.43 (0.68–2.98) | 0.345  |
| > 365 days                                    | 6/564 (1.1%)        | 21/2,102 (1.0%)       | 1.07 (0.43-2.67) | 0.883 | 0.92 (0.44–1.92) | 0.823  |
| Alcohol consumption <1 time a week (n=12,420) |                     |                       |                  |       |                  |        |
| < 90 days                                     | 2,495/2,537 (98.3%) | 9,729/9,883 (98.4%)   | 1                |       | 1                |        |
| 90 - 365 days                                 | 26/2,537 (1.0%)     | 95/9,883 (1.0%)       | 1.07 (0.69-1.65) | 0.766 | 1.02 (0.72–1.46) | 0.906  |
| > 365 days                                    | 16/2,537 (0.6%)     | 59/9,883 (0.6%)       | 1.06 (0.61-1.84) | 0.841 | 0.98 (0.63–1.52) | 0.917  |
| Alcohol consumption ≥1 time a week (n=3,325)  |                     |                       |                  |       |                  |        |
| < 90 days                                     | 597/612 (97.5%)     | 2,650/2,713 (97.7%)   | 1                |       | 1                |        |
| 90 - 365 days                                 | 7/612 (1.1%)        | 38/2,713 (1.4%)       | 0.82 (0.36-1.84) | 0.627 | 0.68 (0.37–1.28) | 0.232  |
| > 365 days                                    | 8/612 (1.3%)        | 25/2,713 (0.9%)       | 1.42 (0.64-3.17) | 0.390 | 1.16 (0.61–2.22) | 0.648  |
| SBP < 140 mmHg and DBP < 90 mmHg (n=11,670)   |                     |                       |                  |       |                  |        |
| < 90 days                                     | 2,360/2,403 (98.2%) | 9,113/9,267 (98.3%)   | 1                |       | 1                |        |
| 90 - 365 days                                 | 25/2,403 (1.0%)     | 96/9,267 (1.0%)       | 1.01 (0.65-1.57) | 0.980 | 0.90 (0.63–1.29) | 0.564  |
| > 365 days                                    | 18/2,403 (0.7%)     | 58/9,267 (0.6%)       | 1.20 (0.70-2.04) | 0.504 | 1.06 (0.69–1.63) | 0.801  |
| SBP ≥ 140 mmHg or DBP ≥ 90 mmHg (n=4,075)     |                     |                       |                  |       |                  |        |
| < 90 days                                     | 732/746 (98.1%)     | 3,266/3,329 (98.1%)   | 1                |       | 1                |        |
| 90 - 365 days                                 | 8/746 (1.1%)        | 37/3,329 (1.1%)       | 0.97 (0.45-2.08) | 0.928 | 1.04 (0.57–1.90) | 0.898  |
| > 365 days                                    | 6/746 (0.8%)        | 26/3,329 (0.8%)       | 1.03 (0.42-2.51) | 0.948 | 1.05 (0.52–2.10) | 0.899  |
| Fasting blood glucose < 100 mg/dL (n=10,584)  |                     |                       |                  |       |                  |        |
| < 90 days                                     | 2,167/2,200 (98.5%) | 8,281/8,384 (98.8%)   | 1                |       | 1                |        |
| 90 - 365 days                                 | 19/2,200 (0.9%)     | 67/8,384 (0.8%)       | 1.08 (0.65-1.81) | 0.758 | 1.01 (0.66–1.55) | 0.953  |
| > 365 days                                    | 14/2,200 (0.6%)     | 36/8,384 (0.4%)       | 1.49 (0.80-2.76) | 0.209 | 1.31 (0.78–2.20) | 0.313  |
| Fasting blood glucose ≥ 100 mg/dL (n=5,161)   |                     |                       |                  |       |                  |        |
| < 90 days                                     | 925/949 (97.5%)     | 4,098/4,212 (97.3%)   | 1                |       | 1                |        |
| 90 - 365 days                                 | 14/949 (1.5%)       | 66/4,212 (1.6%)       | 0.94 (0.53-1.68) | 0.834 | 0.88 (0.56–1.38) | 0.572  |
| > 365 days                                    | 10/949 (1.1%)       | 48/4,212 (1.1%)       | 0.92 (0.47-1.83) | 0.819 | 0.88 (0.52–1.48) | 0.636  |
| Total cholesterol < 200 mg/dL (n=7,977)       |                     |                       |                  |       |                  |        |
| < 90 days                                     | 1,618/1,640 (98.7%) | 6,225/6,337 (98.2%)   | 1                |       | 1                |        |
| 90 - 365 days                                 | 11/1,640 (0.7%)     | 62/6,337 (1.0%)       | 0.68 (0.36-1.30) | 0.246 | 0.61 (0.37–1.00) | 0.049* |
| > 365 days                                    | 11/1,640 (0.7%)     | 50/6,337 (0.8%)       | 0.85 (0.44-1.63) | 0.618 | 0.74 (0.44–1.24) | 0.258  |
| Total cholesterol ≥ 200 mg/dL (n=7,768)       |                     |                       |                  |       |                  |        |
| < 90 days                                     | 1,474/1,509 (97.7%) | 6,154/6,259 (98.3%)   | 1                |       | 1                |        |
| 90 - 365 days                                 | 22/1,509 (1.5%)     | 71/6,259 (1.1%)       | 1.29 (0.80-2.09) | 0.295 | 1.27 (0.85–1.90) | 0.244  |
| > 365 days                                    | 13/1,509 (0.9%)     | 34/6,259 (0.5%)       | 1.60 (0.84-3.03) | 0.152 | 1.62 (0.94–2.80) | 0.084  |



|                                                                     |                     |                       |                  |        |                  |        |
|---------------------------------------------------------------------|---------------------|-----------------------|------------------|--------|------------------|--------|
| Hemoglobin $\geq$ 12 g/dL for men and $>$ 10 g/dL for women (n=301) |                     |                       |                  |        |                  |        |
| < 90 days                                                           | 71/75 (94.7%)       | 210/226 (92.9%)       | 1                |        | 1                |        |
| 90 - 365 days                                                       | 3/75 (4.0%)         | 8/226 (3.5%)          | 0.75 (0.08-6.85) | 0.802  | 0.82 (0.10–6.45) | 0.848  |
| > 365 days                                                          | 1/75 (1.3%)         | 8/226 (3.5%)          | 1.51 (0.13-16.9) | 0.739  | 1.76 (0.18–16.8) | 0.625  |
| Hemoglobin $<$ 12 g/dL for men and $<$ 10 g/dL for women (n=15,444) |                     |                       |                  |        |                  |        |
| < 90 days                                                           | 2,793/3,074 (90.9%) | 11,181/12,370 (90.4%) | 1                |        | 1                |        |
| 90 - 365 days                                                       | 159/3,074 (5.2%)    | 578/12,370 (4.7%)     | 1.00 (0.68-1.47) | 0.996  | 0.94 (0.69–1.29) | 0.713  |
| > 365 days                                                          | 122/3,074 (4.0%)    | 611/12,370 (4.9%)     | 1.13 (0.71-1.80) | 0.607  | 1.05 (0.72–1.53) | 0.801  |
| CCI scores = 0 (n=11,002)                                           |                     |                       |                  |        |                  |        |
| < 90 days                                                           | 1,893/2,058 (92.0%) | 8,185/8,944 (91.5%)   | 1                |        | 1                |        |
| 90 - 365 days                                                       | 98/2,058 (4.8%)     | 376/8,944 (4.2%)      | 0.56 (0.30-1.04) | 0.067  | 0.54 (0.34–0.85) | 0.008* |
| > 365 days                                                          | 67/2,058 (3.3%)     | 383/8,944 (4.3%)      | 1.74 (0.97-3.11) | 0.063  | 1.62 (0.99–2.66) | 0.054  |
| CCI scores = 1 (n=2,213)                                            |                     |                       |                  |        |                  |        |
| < 90 days                                                           | 512/573 (89.4%)     | 1,442/1,640 (87.9%)   | 1                |        | 1                |        |
| 90 - 365 days                                                       | 33/573 (5.8%)       | 93/1,640 (5.7%)       | 2.89 (1.25-6.70) | 0.013* | 3.13 (1.31–7.44) | 0.010* |
| > 365 days                                                          | 28/573 (4.9%)       | 105/1,640 (6.4%)      | 0.83 (0.27-2.52) | 0.739  | 0.85 (0.33–2.20) | 0.742  |
| CCI scores $\geq$ 2 (n=2,530)                                       |                     |                       |                  |        |                  |        |
| < 90 days                                                           | 459/518 (88.6%)     | 1,764/2,012 (87.7%)   | 1                |        | 1                |        |
| 90 - 365 days                                                       | 31/518 (6.0%)       | 117/2,012 (5.8%)      | 1.18 (0.60-2.34) | 0.631  | 1.00 (0.56–1.79) | 0.995  |
| > 365 days                                                          | 28/518 (5.4%)       | 131/2,012 (6.5%)      | 0.52 (0.18-1.47) | 0.216  | 0.45 (0.19–1.03) | 0.058  |
| Non dyslipidemia history (n=8,594)                                  |                     |                       |                  |        |                  |        |
| < 90 days                                                           | 1,571/1,596 (98.4%) | 6,898/6,998 (98.6%)   | 1                |        | 1                |        |
| 90 - 365 days                                                       | 13/1,596 (0.8%)     | 51/6,998 (0.7%)       | 0.88 (0.25-3.04) | 0.837  | 0.84 (0.32–2.20) | 0.730  |
| > 365 days                                                          | 12/1,596 (0.8%)     | 49/6,998 (0.7%)       | 2.93 (0.83-10.4) | 0.096  | 2.57 (0.83–7.97) | 0.101  |
| Dyslipidemia history (n=7,151)                                      |                     |                       |                  |        |                  |        |
| < 90 days                                                           | 1,293/1,553 (83.3%) | 4,493/5,598 (80.3%)   | 1                |        | 1                |        |
| 90 - 365 days                                                       | 149/1,553 (9.6%)    | 535/5,598 (9.6%)      | 0.91 (0.61-1.37) | 0.662  | 0.99 (0.70–1.38) | 0.931  |
| > 365 days                                                          | 111/1,553 (7.1%)    | 570/5,598 (10.2%)     | 0.92 (0.56-1.51) | 0.746  | 0.95 (0.64–1.43) | 0.819  |

Abbreviations: RA, Rheumatoid arthritis; CCI, Charlson Comorbidity Index; SBP, Systolic blood pressure; DBP, Diastolic blood pressure;

\* Significance at  $P < 0.05$

† Adjusted for age, sex, income, region of residence, SBP, DBP, fasting blood glucose, total cholesterol, hemoglobin, obesity, smoking, alcohol consumption, dyslipidemia history, and CCI scores.

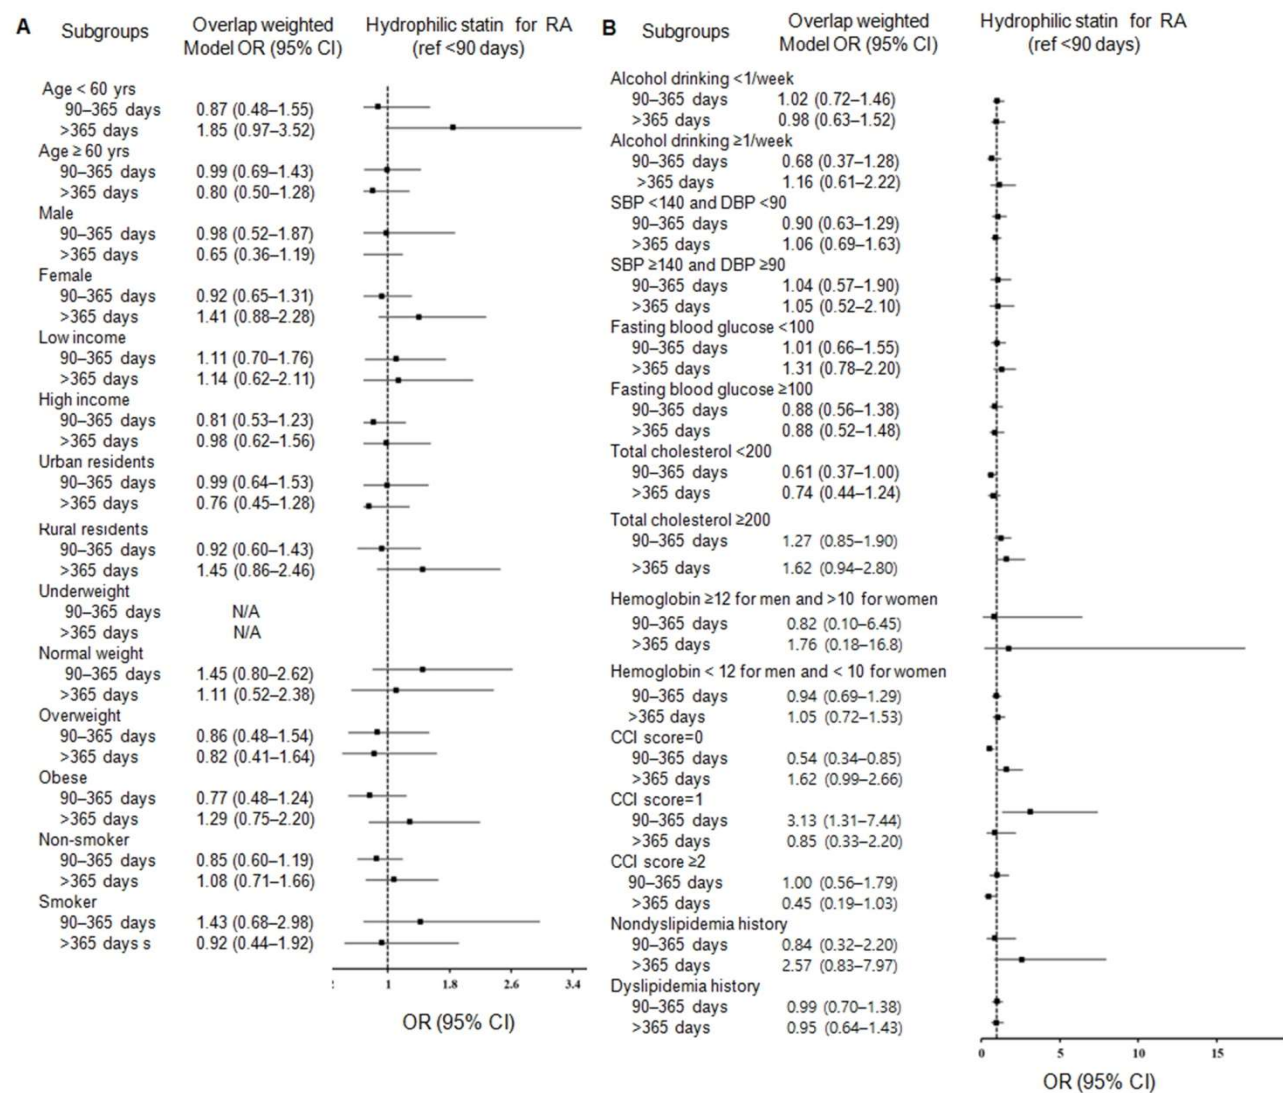

**Supplementary Figure S1.** Forest plots depicting the association between use duration of hydrophilic statin and a subsequent risk of incident rheumatoid arthritis (RA) in each subgroup.
